# Supplementary material for: A Chinese host genetic study discovered type I interferons and causality of cholesterol levels and WBC counts on COVID-19 severity
Source: bioRxiv or medRxiv preprint supplement (doi:10.1101/2021.06.04.21258335), 2021-06-09

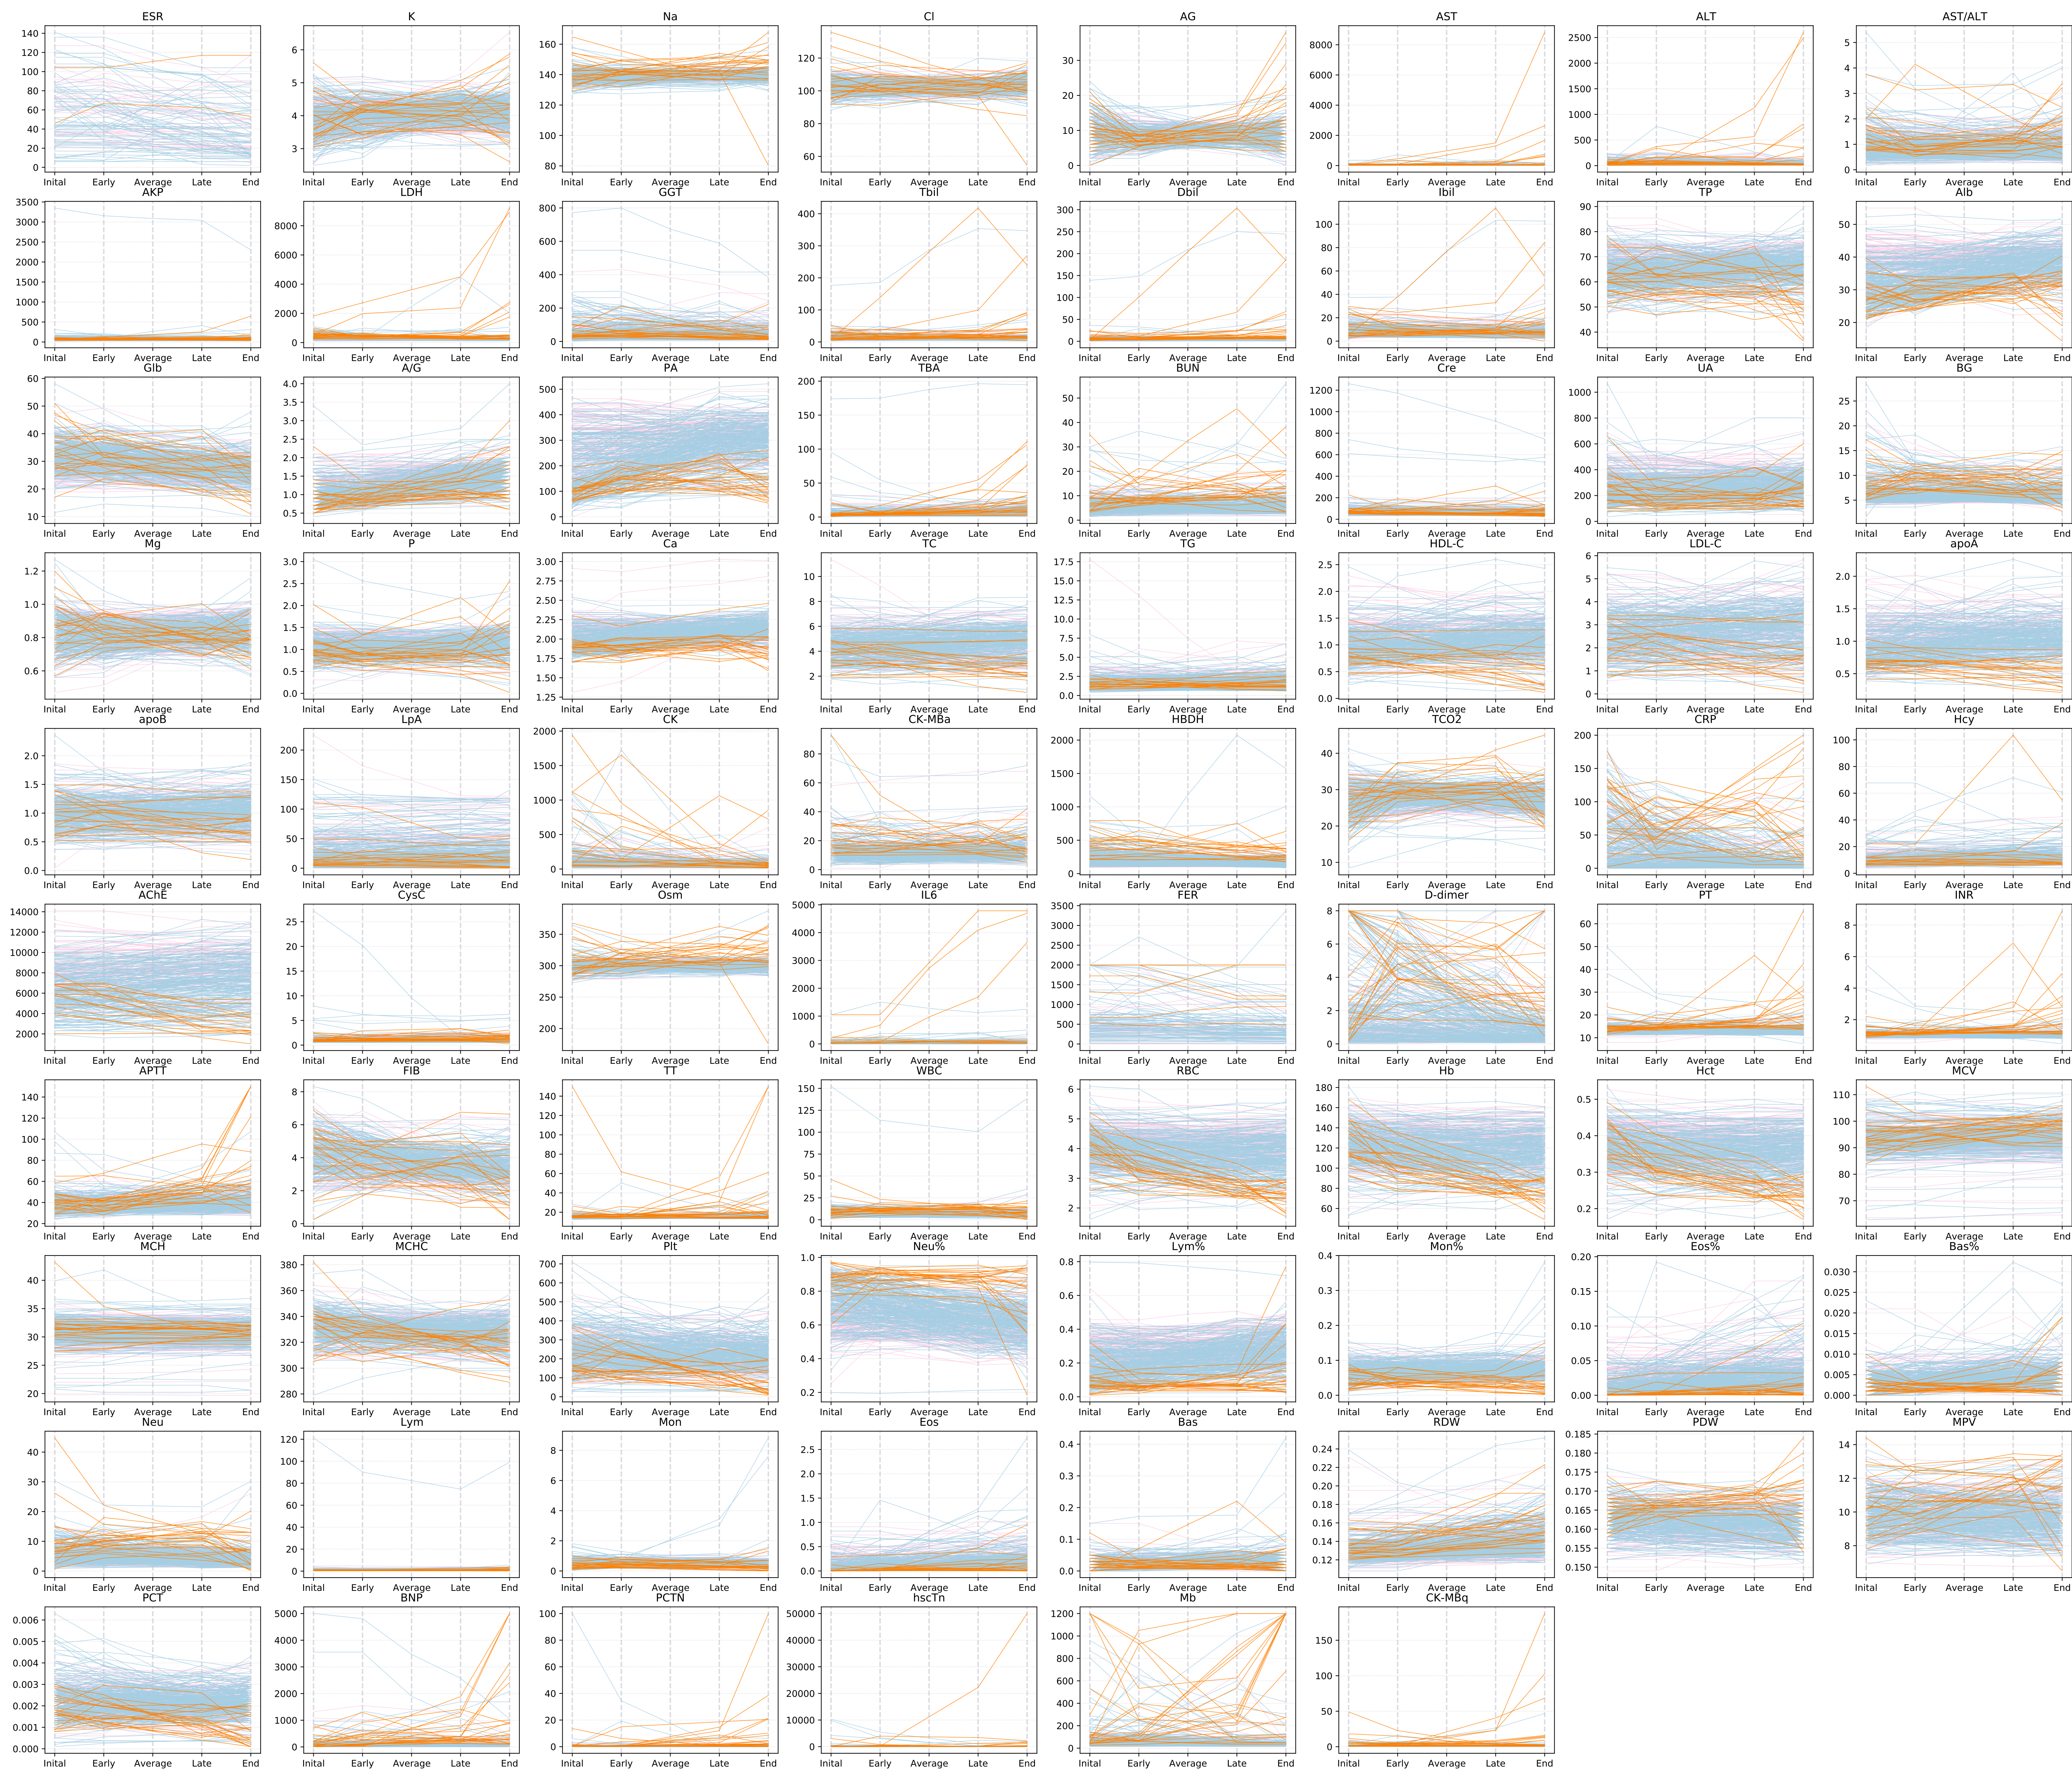

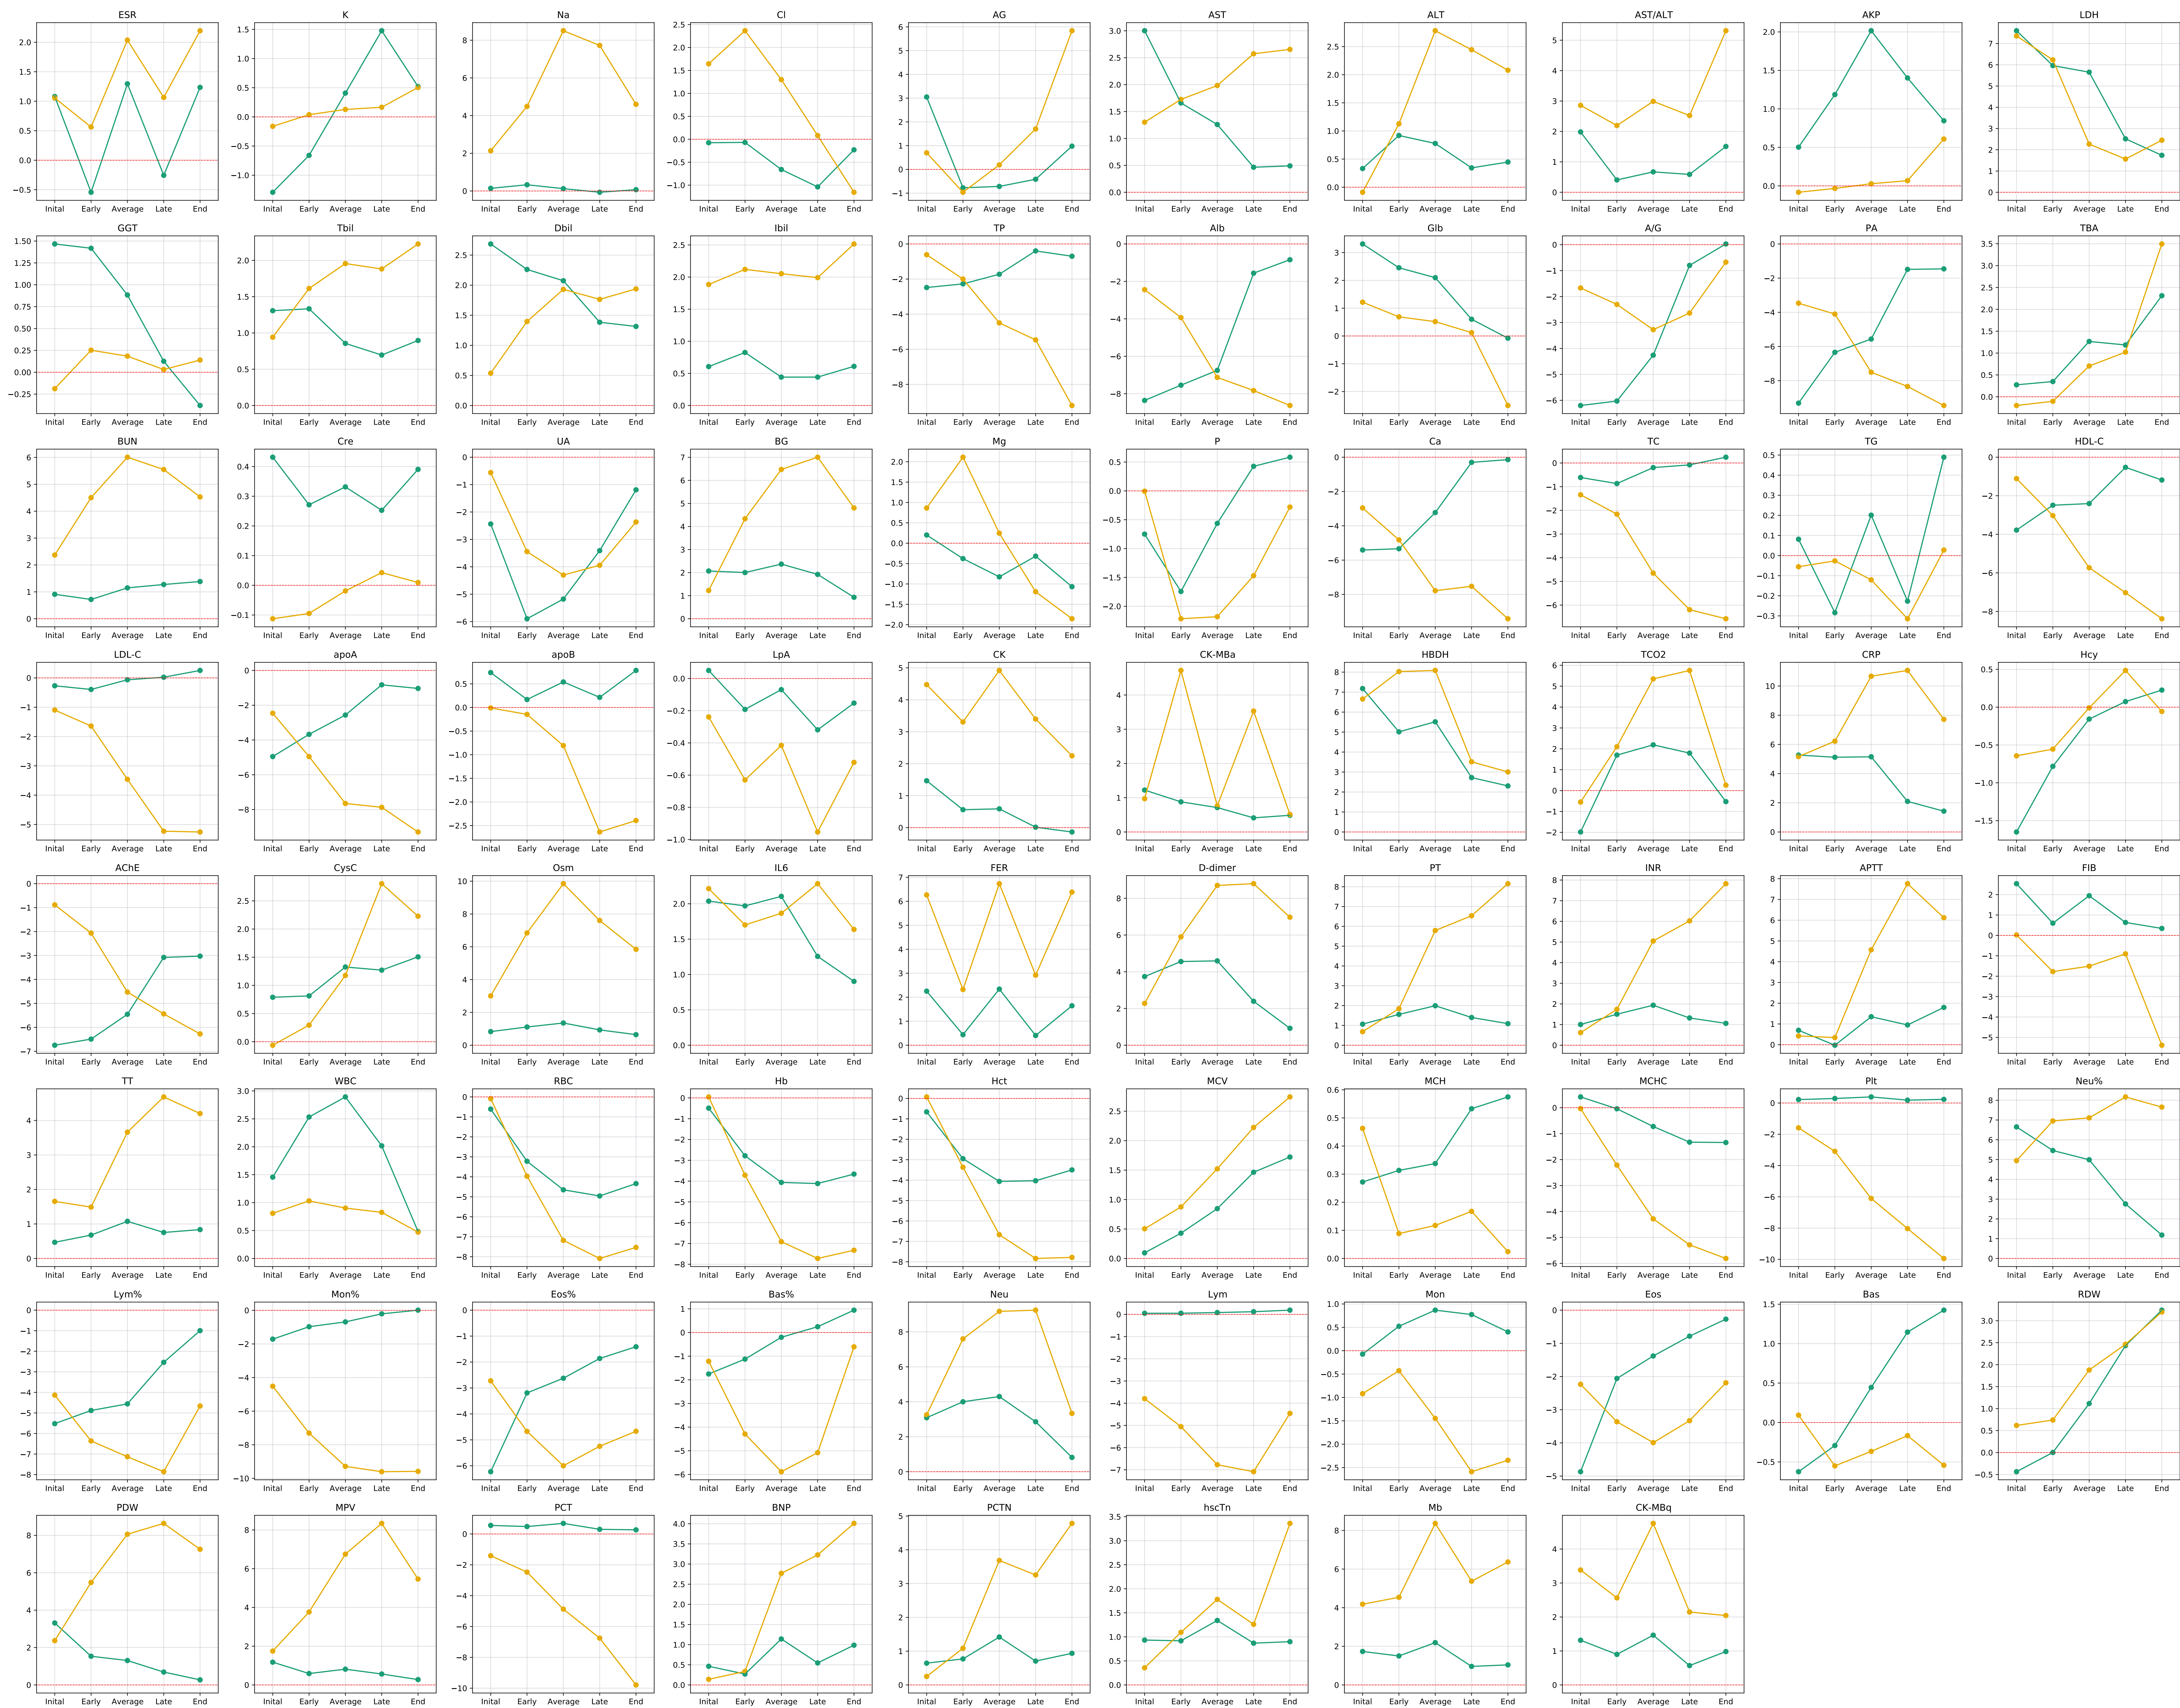

Supplement: Supplementary file [file media-1.zip]
